# Supplementary material
Source: publisher figshare collection journal article supplement (https://karger.figshare.com/articles/dataset/_/5401828)
Supplement: Supplementary file 1 [file 1]

**Table S2:** primers sequences of selected genes for validation by RT-qPCR. *gapdh* is the calibrator gene. Primer sequences, PCR efficiencies and amplicon melting temperature (T<sub>m</sub>) are shown.

| Primers              | Sequences                                           | PCR Efficiency | Amplicon T <sub>m</sub> |
|----------------------|-----------------------------------------------------|----------------|-------------------------|
| <b><i>GBP 6</i></b>  | F:TCTGCTTTCAAAGGCCCTAA<br>R:CCTGGGCACATGGAAATAGT    | 1.83           | 84.6                    |
| <b><i>TNIK</i></b>   | F: TCACCTGCACCAGCATAAAG<br>R: AGGTATTCCTCCTGCCCACT  | 1.83           | 85.7                    |
| <b><i>ETS 1</i></b>  | F: CATGCGTGTGTGTGTCTCTG<br>R:GAAGCAAGGACCGAAGTCTG   | 1.89           | 86.7                    |
| <b><i>HTRA 4</i></b> | F: ATCCAGAATTCCCTGACGTG<br>R: TCAATCACATCGGTTGTCGT  | 1.82           | 86.6                    |
| <b><i>PIM 2</i></b>  | F: TCTCGTCACCAGTACCATGC<br>R: AGTGGAGTTCAGCCTCCAGA  | 1.85           | 87.1                    |
| <b><i>LTB</i></b>    | F: GATGGCATCACCAACTCCTT<br>R: TCAGTCGCTCAGTCATGTCC  | 1.88           | 87.4                    |
| <b><i>PRKC Q</i></b> | F: GGTCTCCCATGCTCCATAAA<br>R: CTTTCTTTGTTGCGGCTCAGG | 1.83           | 86.9                    |
| <b><i>PDE8A</i></b>  | F: AATAGTGCGGTACCCCTGTG<br>R:TCAGGTGGTGGTTAGGGAAG   | 1.83           | 90.5                    |
| <b><i>TTLL 1</i></b> | F: GTGCTACGGCTACGACATCA<br>R: CGATGTTGAGGGTGTCATTG  | 1.92           | 88.0                    |
| <b><i>ERAP 1</i></b> | F: TGCTTTCAAGGCGAGTTTTT<br>R: GTCCTTCAGCCACAGTCACA  | 1.90           | 84.2                    |
| <b><i>GAPDH</i></b>  | F: ATCTCTGCACCTTCTGCCGA<br>R: GCAGGAGGCATTGCTGACA   | 1.90           | 86.2                    |
