# Supplementary material
Source: publisher figshare collection journal article supplement (https://karger.figshare.com/articles/dataset/_/5401828)
Supplement: Supplementary file 2 [file 1]

**Table S1: Gene ontology (GO) terms and Uniprot Keywords enriched among genes identified as differentially expressed between protected and unprotected groups.**

Only terms or keywords with ten or more occurrences are shown (Count  $\geq 10$ ). The percent (%) column shows the fraction of genes in the differential set relative to the total number of genes with that annotation.

| Term                                                 | Count | %     | P value | Affymetrix probeset | Gene                                                               |
|------------------------------------------------------|-------|-------|---------|---------------------|--------------------------------------------------------------------|
| GO:0005794<br>Cellular Component:<br>Golgi apparatus | 10    | 5.08  | 0.034   | BT.18123.2.S1_AT    | golgin, RAB6 interacting (GORAB)                                   |
|                                                      |       |       |         | BT.5935.2.S1_A_AT   | lysosomal protein transmembrane 4 alpha (LAPTM4A)                  |
|                                                      |       |       |         | BT.2846.1.A1_AT     | ras homolog family member U (RHOU)                                 |
|                                                      |       |       |         | BT.26610.3.S1_A_AT  | adaptor related protein complex 4 mu 1 subunit (AP4M1)             |
|                                                      |       |       |         | BT.8800.1.S1_AT     | ST3 beta-galactoside alpha-2,3-sialyltransferase 3 (ST3GAL3)       |
|                                                      |       |       |         | BT.4786.1.S1_AT     | clathrin heavy chain (CLTC)                                        |
|                                                      |       |       |         | BT.10928.1.A1_AT    | retinitis pigmentosa GTPase regulator (RPGR)                       |
|                                                      |       |       |         | BT.9215.2.S1_AT     | WW domain containing oxidoreductase (WWOX)                         |
|                                                      |       |       |         | BT.17757.1.S1_AT    | solute carrier family 35 member A5 (SLC35A5)                       |
| SP:phosphoprotein                                    | 38    | 19.29 | 0.034   | BT.13163.1.S1_AT    | adaptor-related protein complex 2, beta 1 subunit (AP2B1)          |
|                                                      |       |       |         | BT.11005.1.S1_AT    | SH3 binding domain protein 5 like (SH3BP5L)                        |
|                                                      |       |       |         | BT.384.1.S1_AT      | crystallin beta A4 (CRYBA4)                                        |
|                                                      |       |       |         | BT.8712.1.S1_AT     | stromal interaction molecule 1 (STIM1)                             |
|                                                      |       |       |         | BT.13716.1.S1_A_AT  | tonsoku-like, DNA repair protein (TONSL)                           |
|                                                      |       |       |         | BT.5021.1.S1_AT     | fibrillin 1 (FBN1)                                                 |
|                                                      |       |       |         | BT.12071.2.S1_AT    | sirtuin 7 (SIRT7)                                                  |
|                                                      |       |       |         | BT.4713.1.S1_AT     | Proopiomelanocortin (POMC)                                         |
|                                                      |       |       |         | BT.15741.1.S1_AT    | WD repeat domain 48 (WDR48)                                        |
|                                                      |       |       |         | BT.19954.1.A1_AT    | ERCC excision repair 3, TFIIH core complex helicase subunit(ERCC3) |
|                                                      |       |       |         | BT.29872.1.S1_AT    | cyclin T1 (CCNT1)                                                  |

|                    |                                                                  |
|--------------------|------------------------------------------------------------------|
| BT.1054.1.S1_AT    | Rho/Rac guanine nucleotide exchange factor 18 (ARHGEF18)         |
| BT.6795.1.S1_AT    | actin related protein 2/3 complex subunit 3 (ARPC3)              |
| BT.5517.1.S1_AT    | 2',3'-cyclic nucleotide 3' phosphodiesterase (CNP)               |
| BT.22848.1.S1_AT   | zinc finger CCCH-type and G-patch domain containing (ZGPAT)      |
| BT.20043.1.S1_AT   | dual specificity phosphatase 14 (DUSP14)                         |
| BT.20392.1.A1_AT   | eukaryotic translation initiation factor 3 subunit J (EIF3J)     |
| BT.13391.1.S1_AT   | capping actin protein of muscle Z-line alpha subunit 2 (CAPZA2)  |
| BT.AFFX.1.20.S1_AT | regulator of G-protein signaling 20 (RGS20)                      |
| BT.12770.1.A1_AT   | synuclein alpha (SNCA)                                           |
| BT.18623.1.A1_AT   | microtubule associated protein RP/EB family member 2 (MAPRE2)    |
| BT.16026.1.S1_AT   | potassium channel regulator (KCNRG)                              |
| BT.22700.1.A1_AT   | phosphatidylinositol-5-phosphate 4-kinase type 2 gamma (PIP4K2C) |
| BT.17757.1.S1_AT   | solute carrier family 35 member A5 (SLC35A5)                     |
| BT.28097.1.S1_AT   | integrator complex subunit 7 (INTS7)                             |
| BT.26610.3.S1_A_AT | adaptor related protein complex 4 mu 1 subunit (AP4M1)           |
| BT.4263.1.S1_AT    | G protein-coupled receptor kinase 5 (GRK5)                       |
| BT.4134.1.A1_AT    | serologically defined colon cancer antigen 3 (SDCCAG3)           |
| BT.25720.1.S1_AT   | flotillin 2 (FLOT2)                                              |
| BT.4786.1.S1_AT    | clathrin heavy chain (CLTC)                                      |
| BT.11489.2.A1_AT   | histone cluster 1, H3e (HIST1H3E)                                |
| BT.13163.1.S1_AT   | adaptor-related protein complex 2, beta 1 subunit (AP2B1)        |
| BT.26844.2.S1_AT   | spindle and kinetochore associated complex subunit 3 (SKA3)      |
| BT.5935.2.S1_A_AT  | lysosomal protein transmembrane 4 alpha (LAPTM4A)                |
| BT.6645.2.A1_AT    | RNA binding region (RNP1, RRM) containing 3 (RNPC3)              |
| BT.20359.1.S1_AT   | IKAROS family zinc finger 3 (IKZF3)                              |

|                                                                        |    |       |       |                  |                                                                 |
|------------------------------------------------------------------------|----|-------|-------|------------------|-----------------------------------------------------------------|
|                                                                        |    |       |       | BT.10397.2.S1_AT | ring finger protein 20 (RNF20)                                  |
|                                                                        |    |       |       | BT.28515.1.A1_AT | casein kinase 1 gamma 3 (CSNK1G3)                               |
|                                                                        |    |       |       | BT.4510.1.S1_AT  | polyamine modulated factor 1 (PMF1)                             |
| GO:0043232                                                             | 21 | 10.66 | 0.052 | BT.26987.1.S1_AT | coilin (COIL)                                                   |
| Cellular Component:<br>intracellular non-membrane-bounded<br>organelle |    |       |       | BT.2846.1.A1_AT  | ras homolog family member U (RHOU)                              |
|                                                                        |    |       |       | BT.27320.1.A1_AT | shugoshin 2 (SGO2)                                              |
|                                                                        |    |       |       | BT.3125.1.S1_AT  | tubulin tyrosine ligase like 1 (TTLL1)                          |
|                                                                        |    |       |       | BT.12071.2.S1_AT | sirtuin 7 (SIRT7)                                               |
|                                                                        |    |       |       | BT.9506.1.S1_AT  | M-phase phosphoprotein 8 (MPHOSPH8)                             |
|                                                                        |    |       |       | BT.11489.2.A1_AT | histone cluster 1, H3e (HIST1H3E)                               |
|                                                                        |    |       |       | BT.12768.1.S1_AT | phosphoenolpyruvate carboxykinase 1 (PCK1)                      |
|                                                                        |    |       |       | BT.29910.1.S1_AT | sarcoglycan epsilon (SGCE)                                      |
|                                                                        |    |       |       | BT.1054.1.S1_AT  | Rho/Rac guanine nucleotide exchange factor 18 (ARHGEF18)        |
|                                                                        |    |       |       | BT.26844.2.S1_AT | spindle and kinetochore associated complex subunit 3 (SKA3)     |
|                                                                        |    |       |       | BT.17939.1.S1_AT | lamin B1 (LMNB1)                                                |
|                                                                        |    |       |       | BT.6795.1.S1_AT  | actin related protein 2/3 complex subunit 3 (ARPC3)             |
|                                                                        |    |       |       | BT.12561.1.S1_AT | ras homolog family member F, filopodia associated (RHOF)        |
|                                                                        |    |       |       | BT.2825.1.S1_AT  | mitochondrial ribosomal protein L13 (MRPL13)                    |
|                                                                        |    |       |       | BT.13391.1.S1_AT | capping actin protein of muscle Z-line alpha subunit 2 (CAPZA2) |
|                                                                        |    |       |       | BT.10397.2.S1_AT | ring finger protein 20 (RNF20)                                  |
|                                                                        |    |       |       | BT.12770.1.A1_AT | synuclein alpha (SNCA)                                          |
|                                                                        |    |       |       | BT.18623.1.A1_AT | microtubule associated protein RP/EB family member 2 (MAPRE2)   |
|                                                                        |    |       |       | BT.4510.1.S1_AT  | polyamine modulated factor 1 (PMF1)                             |
|                                                                        |    |       |       | BT.1430.1.S1_AT  | prefoldin subunit 5 (PFDN5)                                     |
| GO:0043228                                                             | 21 | 10.66 | 0.052 | BT.26987.1.S1_AT | coilin (COIL)                                                   |

Cellular Component:

non-membrane-bounded organelle

|                  |                                                                 |
|------------------|-----------------------------------------------------------------|
| BT.2846.1.A1_AT  | ras homolog family member U (RHOU)                              |
| BT.27320.1.A1_AT | shugoshin 2(SGO2)                                               |
| BT.3125.1.S1_AT  | tubulin tyrosine ligase like 1 (TTLL1)                          |
| BT.12071.2.S1_AT | sirtuin 7(SIRT7)                                                |
| BT.9506.1.S1_AT  | M-phase phosphoprotein 8 (MPHOSPH8)                             |
| BT.11489.2.A1_AT | histone cluster 1, H3e (HIST1H3E)                               |
| BT.12768.1.S1_AT | phosphoenolpyruvate carboxykinase 1 (PCK1)                      |
| BT.29910.1.S1_AT | sarcoglycan epsilon (SGCE)                                      |
| BT.1054.1.S1_AT  | Rho/Rac guanine nucleotide exchange factor 18 (ARHGEF18)        |
| BT.26844.2.S1_AT | spindle and kinetochore associated complex subunit 3 (SKA3)     |
| BT.17939.1.S1_AT | lamin B1 (LMNB1)                                                |
| BT.6795.1.S1_AT  | actin related protein 2/3 complex subunit 3 (ARPC3)             |
| BT.12561.1.S1_AT | ras homolog family member F, filopodia associated (RHOF)        |
| BT.2825.1.S1_AT  | mitochondrial ribosomal protein L13 (MRPL13)                    |
| BT.13391.1.S1_AT | capping actin protein of muscle Z-line alpha subunit 2 (CAPZA2) |
| BT.10397.2.S1_AT | ring finger protein 20 (RNF20)                                  |
| BT.12770.1.A1_AT | synuclein alpha (SNCA)                                          |
| BT.18623.1.A1_AT | microtubule associated protein RP/EB family member 2 (MAPRE2)   |
| BT.4510.1.S1_AT  | polyamine modulated factor 1 (PMF1)                             |
| BT.1430.1.S1_AT  | prefoldin subunit 5 (PFDN5)                                     |

---
